# Supplementary material
Source: MDPI journal article supplement (https://www.mdpi.com/2071-1050/16/6/2587)
Supplement: s1 [file s1]

**Table S1.** Tracked excavators over 35T.

| Country | Producer    | Type         | Engine power<br>(kW) | Average consumption<br>(l/wh) |
|---------|-------------|--------------|----------------------|-------------------------------|
| SK      | CATERPILLAR | 345          | 239                  | 22.40                         |
| CZ      | CATERPILLAR | 336D LN      | 210                  | 22.29                         |
| CZ      | VOLVO       | EC360CL      | 190                  | 19.49                         |
| CZ      | VOLVO       | EC460BLC     | 230                  | 17.23                         |
| CZ      | KOMATSU     | PC350LC-8    | 220                  | 20.82                         |
| CZ      | KOMATSU     | PC350LC-8    | 235                  |                               |
| CZ      | VOLVO       | EC380DL      | 208                  | 16.08                         |
| HU      | CATERPILLAR | 385CLME      | 395                  | 51.83                         |
| PL      | CATERPILLAR | 336E         | 240                  | 25.04                         |
| CZ      | VOLVO       | EC380EL      | 208                  | 22.07                         |
| CZ      | VOLVO       | EC380EL      | 208                  | 18.53                         |
| PL      | CATERPILLAR | 340F LME     | 230                  | 22.69                         |
| CZ      | VOLVO       | EC380EL      | 208                  | 16.23                         |
| RO      | CATERPILLAR | 336FL        | 235                  | 29.40                         |
| HU      | VOLVO       | EC480DL      | 256                  | 24.29                         |
| CZ      | VOLVO       | EC480DL      | 265                  | 20.27                         |
| CZ      | VOLVO       | EC480EL      | 278                  | 25.75                         |
| HU      | VOLVO       | EC480EL      | 278                  | 20.82                         |
| HU      | VOLVO       | EC 480EL     | 278                  | 27.83                         |
| RO      | CATERPILLAR | 352F         | 311                  | 39.04                         |
| SK      | CATERPILLAR | 352 NEXT GEN | 316                  | 29.70                         |
| PL      | VOLVO       | EC750E       | 384                  | 51.16                         |
| HU      | CATERPILLAR | 390FL        | 405                  | 53.86                         |

**Table S2.** Wheel loaders over 135kW.

| Country | Producer    | Type                     | Engine power<br>(kW) | Average consumption<br>(l/wh) |
|---------|-------------|--------------------------|----------------------|-------------------------------|
| RO      | CATERPILLAR | 950H                     | 135                  | 13.96                         |
| RO      | CATERPILLAR | 950H                     | 135                  | 14.54                         |
| RO      | CATERPILLAR | 938GII                   | 118                  | 10.46                         |
| HU      | CATERPILLAR | 950H                     | 135                  | 12.99                         |
| HU      | CATERPILLAR | 950GII                   | 137                  | 10.09                         |
| HU      | CATERPILLAR | 950GII                   | 137                  | 9.99                          |
| HU      | CATERPILLAR | 950G                     | 136                  | 15.26                         |
| HU      | CATERPILLAR | 950GII                   | 137                  | 13.47                         |
| HU      | CATERPILLAR | 950H                     | 147                  | 10.54                         |
| HU      | CATERPILLAR | 950H                     | 147                  | 13.02                         |
| HU      | CATERPILLAR | 950H                     | 147                  | 14.82                         |
| HU      | VOLVO       | L110H                    | 155                  | 11.94                         |
| HU      | CATERPILLAR | 950K                     | 135                  | 11.43                         |
| HU      | CATERPILLAR | 950K                     | 135                  | 14.50                         |
| HU      | VOLVO       | L110H                    | 190                  | 11.66                         |
| CZ      | LIEBHERR    | L546                     | 120                  | 7.35                          |
| CZ      | LIEBHERR    | L546                     | 120                  | 7.49                          |
| CZ      | VOLVO       | L110H                    | 191                  | 10.31                         |
| CZ      | CATERPILLAR | 950GC                    | 169                  | 11.13                         |
| CZ      | CATERPILLAR | 950GC                    | 169                  | 14.88                         |
| CZ      | LIEBHERR    | L550                     | 140                  | 10.43                         |
| SK      | CATERPILLAR | 962                      | 158                  | 14.46                         |
| CZ      | VOLVO       | L150F                    | 183                  | 15.73                         |
| CZ      | CATERPILLAR | 962H                     | 160                  | 30.81                         |
| HU      | CATERPILLAR | 980KHL                   | 274                  | 22.44                         |
| HR      | CATERPILLAR | 962H                     | 158                  |                               |
| HR      | VOLVO       | L150F                    | 210                  |                               |
| PL      | VOLVO       | L180F                    | 235                  | 20.72                         |
| RO      | CATERPILLAR | 962H                     | 157                  | 17.28                         |
| SK      | CATERPILLAR | 980                      | 293                  | 15.80                         |
| HU      | CATERPILLAR | 988H                     | 373                  | 28.73                         |
| HU      | CATERPILLAR | 972H                     | 214                  | 17.35                         |
| CZ      | VOLVO       | L120H                    | 171                  | 10.17                         |
| HU      | VOLVO       | L150H                    | 220                  | 14.96                         |
| HU      | VOLVO       | L110H                    | 190                  | 11.42                         |
| CZ      | VOLVO       | L120H                    | 200                  | 12.34                         |
| CZ      | VOLVO       | L120H                    | 200                  | 10.58                         |
| SK      | CATERPILLAR | 972M                     | 247                  | 18.25                         |
| CZ      | VOLVO       | L120H                    | 203                  | 12.47                         |
| HU      | VOLVO       | L110H                    | 191                  | 10.70                         |
| CZ      | VOLVO       | L120H                    | 203                  | 10.59                         |
| CZ      | VOLVO       | L150H                    | 220                  | 19.28                         |
| HU      | VOLVO       | L110H                    | 191                  | 13.44                         |
| PL      | VOLVO       | L180H                    | 245                  | 20.31                         |
| RO      | CATERPILLAR | Front loader CAT 966M XE | 222                  | 14.42                         |
| CZ      | VOLVO       | L120H                    | 203                  | 9.54                          |
| CZ      | VOLVO       | L120H                    | 203                  | 15.44                         |
| PL      | CATERPILLAR | 972MXE                   | 232                  | 13.69                         |
| PL      | VOLVO       | L180F                    | 234                  |                               |
| PL      | VOLVO       | L180H                    | 234                  | 16.70                         |

|    |             |                          |     |       |
|----|-------------|--------------------------|-----|-------|
| HR | CATERPILLAR | 966 M XE                 | 250 |       |
| PL | VOLVO       | L180H                    | 234 | 17.40 |
| RO | VOLVO       | Front loader VOLVO L150H | 223 | 17.18 |
| HU | KOMATSU     | WA475                    | 216 |       |
| HU | KOMATSU     | WA475                    | 216 |       |
| HU | VOLVO       | L350H                    | 395 | 29.30 |

**Table S3.** Rigid dumpers payload under 40T.

| Country | Producer    | Engine power<br>(kW) | Average consumption<br>(l/wh) |
|---------|-------------|----------------------|-------------------------------|
| HU      | KOMATSU     | 386                  | 17.83                         |
| RO      | CATERPILLAR | 380                  | 19.95                         |
| RO      | CATERPILLAR | 410                  | 17.13                         |
| SK      | KOMATSU     | 386                  |                               |
| CZ      | BELAZ       | 220                  | 15.87                         |
| CZ      | BELAZ       | 220                  | 22.14                         |
| CZ      | EUCLID      | 200                  |                               |
| CZ      | EUCLID      | 220                  | 12.39                         |
| CZ      | BELAZ       | 220                  | 7.86                          |
| CZ      | BELAZ       | 220                  |                               |
| CZ      | KOMATSU     | 220                  | 18.26                         |
| CZ      | BELAZ       | 220                  | 23.00                         |
| HU      | KOMATSU     | 364                  | 18.16                         |
| HU      | KOMATSU     | 364                  | 22.78                         |
| HU      | KOMATSU     | 364                  | 19.89                         |
| SK      | CATERPILLAR | 381                  | 19.87                         |
| SK      | CATERPILLAR | 381                  | 26.66                         |
| CZ      | CATERPILLAR | 410                  | 19.24                         |
| CZ      | CATERPILLAR | 410                  | 18.70                         |
| HU      | KOMATSU     | 578                  | 26.20                         |
| HU      | KOMATSU     | 578                  | 26.56                         |
| RO      | CATERPILLAR | 446                  |                               |
| HU      | KOMATSU     | 533                  | 28.16                         |
| HU      | KOMATSU     | 533                  | 27.84                         |
| HU      | CATERPILLAR | 524                  | 24.57                         |
| HU      | CATERPILLAR | 544                  | 23.44                         |
